# Supplementary material for: Comparative outcomes for mature T-cell and NK/T-cell lymphomas in people with and without HIV and to AIDS-defining lymphomas
Source: PubMed Central journal article supplement — Blood Adv. 2022 Feb 25;6(5):1420–31. doi: 10.1182/bloodadvances.2021006208 (PMC8905704; doi:10.1182/bloodadvances.2021006208), 2022-02-25
Supplement: advancesADV2021006208-suppl1.pdf [file advancesADV2021006208-suppl1.pdf]

## SUPPLEMENTARY INFORMATION

### EXTENDED DETAILS OF THE METHODS

#### Enrolling Sites for NA-ACCORD cohort

ALIVE: AIDS Link to the IntraVenous Experience  
ALLRT: AACTG Longitudinal Linked Randomized Trials  
CWRU: Case Western Reserve University Immunology Unit Patient Care and Research Database  
DCC: D.C. Cohort Longitudinal HIV Study  
EGHCC: Emory-Grady HIV Clinical Cohort  
FENWAY: Fenway Community Health Center  
HIVRN: HIV Research Network  
HOMER: HAART Observational Medical Evaluation and Research  
HOPS: HIV Outpatient Study  
JHHCC: Johns Hopkins HIV Clinical Cohort  
KPMAS: Kaiser Permanente Mid-Atlantic States  
KPNC: Kaiser Permanente Northern California  
LSOCA: Longitudinal Study of Ocular Complications of AIDS  
MWCCS: MACS/WIHS Combined Cohort Study  
MHCS-II: Second Multicenter Hemophilia Cohort Study  
MLMC: Maple Leaf Medical Clinic  
MONT: The McGill University Health Centre, Chronic Viral Illness Service Cohort  
OHTN: Ontario HIV Treatment Network Cohort Study  
PARKLAND: Parkland/UT Southwestern Cohort  
RRC: Retrovirus Research Center  
SAC: Southern Alberta Clinic Cohort  
SCOPE: Study of the Consequences of the Protease Inhibitor Era  
SUN: The Study to Understand the Natural History of HIV/AIDS in the Era of Effective Therapy  
UAB: University of Alabama at Birmingham 1917 Clinic Cohort  
UCHCC: University of North Carolina, Chapel Hill HIV Clinic  
UCSD: University of California at San Diego  
UW: University of Washington HIV Cohort  
VACS: Veterans Aging Cohort Study and Virtual Cohort  
VAND: Vanderbilt Comprehensive Care Clinic HIV Cohort

**Enrolling Sites for COMPLETE cohort**

Yale University School of Medicine  
Memorial Sloan-Kettering Cancer Center  
UCLA  
Washington University School of Medicine  
Seattle Cancer Care Alliance  
Stanford University Medical Center  
John Theurer Cancer Center at Hackensack University Medical Center  
Emory, Winship Cancer Institute  
University of Chicago Medical Center  
Dartmouth-Hitchcock Medical Center  
Medical College of Georgia  
USC/Norris Comprehensive Cancer Center  
West Virginia University  
Vanderbilt University Medical Center  
University of Wisconsin Comprehensive Cancer Center

Metro Minnesota Community Clinical Oncology Program  
Overlook Hospital and Morristown Memorial Hospital  
University of Rochester  
UNC - Chapel Hill  
Georgetown University Medical Center  
Northwestern University Feinberg School of Medicine  
Carolinas Medical Center – NorthEast  
Arizona Cancer Center  
Saint Louis University Cancer Center  
University of Miami  
St. Francis Medical Group Oncology and Hematology Specialists  
Health Cancer Center - Orlando Health (MD Anderson - Orlando)  
UT Southwestern  
NYU Clinical Cancer Center  
Danbury Hospital, Praxair Cancer Center  
Research Medical Center  
Kootenai Cancer Center  
Fox Chase Cancer Center  
Washington Cancer Institute at Washington Hospital Center  
ProMedica Hematology Oncology Associates  
City of Hope National Medical Center  
Rush University Medical Center

Moore's UCSD Cancer Center  
Simmons Cooper Cancer Institute at SIU School of Medicine  
University of Virginia Health System  
Northside Hospital (formerly Georgia Cancer Specialists)  
Blood and Cancer Center of East Texas  
Indiana University Simon Cancer Center  
Guthrie Clinic, Ltd.  
South Texas Oncology and Hematology, P.A.  
Hematology and Oncology Associates of Fayetteville (Carolina Cancer Management, Inc.)  
LSU Health Sciences Center  
The Cancer Institute of New Jersey  
University of Illinois at Chicago  
University of Tennessee Cancer Institute  
University of Maryland, Greenebaum Cancer Center JPS Center for Cancer Care  
Moffit Cancer Center  
Olive View UCLA Medical Center  
West Michigan Cancer Center

### **Covariates**

Covariates were measured as close to cancer diagnosis as possible, within the window of 6 months before through 3 months after cancer diagnosis. In the NA-ACCORD, the patient's age was denoted by the year of birth. Sex was noted as male or female based on the patient's birth sex. Self-reported race was divided into 7 categories including: Asian, Black, indigenous, multiracial, white, missing, or other (this included Asian/indigenous/multiracial or Hispanic depending on the cohort). Comorbid conditions included chronic kidney disease (CKD) defined as glomerular filtration rate (eGFR) <60 mL/min/1.73m<sup>2</sup> for at least 3 months; Diabetes was defined by use of insulin, oral hypoglycemic drug or diagnostic code or a glycated hemoglobin ≥6.5%; Hepatitis B infection defined as evidence of HBV infection while under observation with positive HBV surface antigen, HBV e antigen or HBV DNA test. Hepatitis C infection as evidence of HCV infection while under study observation with positive HCV antibody test, detectable HCV RNA, or the presence of HCV genotype. Hypertension was defined as prescription of antihypertensive medication with a hypertension diagnosis. AIDS-defining illness was defined according to the 1993 CDC revised classification system. ART therapy was defined as use of at least one class of antiretroviral medications during the NA-ACCORD enrollment period.

For the analysis comparing PWH in NA-ACCORD to PWoH in COMPLETE, age, sex, race, evidence of HIV, HBV and HCV infections were assessed at study entry. In COMPLETE, self-reported race was categorized as black vs. nonblack. Definitions for HIV, HBV and HCV infections were like those utilized by the NA-ACCORD cohort. Data on variables such as CKD, diabetes, hypertension, dyslipidemia, substance use, smoking or alcohol use were collected whenever possible for COMPLETE participants.

### **Statistical Analysis**

People in the COMPLETE study were followed from the date of their cancer diagnosis (occurring between February 5, 2010, and February 5, 2014) to date of death, date of loss to follow-up (defined as no proactive communication by the patient or next of kin back to the site, that the patient was

proactively withdrawing from the study, and that after multiple attempts to communicate, the patient or next of kin could not be contacted, in the absence of any confirmation of death), 5 years after cancer diagnosis or administratively censored on December 17, 2018, whichever came first.

PWH entered observation into our nested study on the date of cancer diagnosis. To ensure incident diagnoses while under observation in the NA-ACCORD, only those with cancer diagnoses occurring after the later of the following were included: enrollment date into the NA-ACCORD, the date that marks the start of the period when cancers diagnoses were investigated using the validation protocol (i.e., the cancer observation window start date), or January 1, 1996. PWH were followed from diagnosis to the first of the following: date of death, December 31, 2016, 5 years after cancer diagnosis or the cohort-specific end of the observation window of validated cancer diagnosis (if it was before December 31, 2016) whichever came first. To account for effect on any uncaptured mortality due to loss to follow up, we performed sensitivity analysis where date of loss to follow up was defined as 18 months after the date of last HIV RNA or CD4 cell count measurement. To compare the survival of PWH and PWoH with T and NK/TCL over the same study periods, we performed additional sensitivity analysis whereby only those patients whose lymphomas were diagnosed between 2010-2014, the overlapping years of diagnosis were included.

Categorical and ordinal variables were summarized by frequencies and percentages and comparisons between groups were performed using Pearson's Chi-squared test and Fisher's exact test. Continuous variables were summarized by mean, median, standard deviation and interquartile range and comparison between groups were performed using t-test, Wilcoxon rank-sum test, and Kruskal-Wallis test. Kaplan-Meier method was used to estimate the survivor function and 95% confidence interval (95% CI). Comparison between survival curves among TCL and ALCL patients with and without HIV, between the TCL and BCL among PWH and over calendar periods from 1996-2016 was performed using log-rank test. A continuous time-to-event approach was used, and Cox proportional model estimated crude (HR) and stepwise adjusted (aHR) hazard ratios of mortality and 95% CI. Analyses were performed using R version 4.1.0 or greater (The R Foundation for Statistical Computing-<http://www.r-project.org/>) and a p-value <0.05 determined statistical significance.

**SUPPLEMENTARY TABLES**

**Table S1: Extended clinical characteristics for people without HIV (PWoH) with T-cell and NK/T-cell lymphoma in COMPLETE (N=450)**

| <b>Characteristic</b>          | <b>PWoH with T-cell and NK/T-cell lymphoma (N=450)</b> |
|--------------------------------|--------------------------------------------------------|
| ECOG Perf. Status, No. (%)     |                                                        |
| 0-1                            | 421 (93.3)                                             |
| 2                              | 26 (5.8)                                               |
| ≥ 3                            | 4 (0.9)                                                |
| Any B Symptoms % (CI)          | 48.6 (44.0, 53.2)                                      |
| LDH Elevated % (CI)            | 46.1 (41.5, 50.8)                                      |
| IPI at diagnosis, Median (IQR) | 2.0 (1.0, 3.0)                                         |

ECOG-Eastern Co-operative Oncology Group, values for ECOG performance status range from 0 to 5, with higher scores indicating greater disability

B symptoms defined as presence of fever or drenching night sweats or loss of more than 10 percent of body weight over 6 months

LDH-lactate dehydrogenase level

The standard Internal Prognostic Index (IPI) score is calculated based on risk factors such as age ≥ 60 years, LDH above baseline, Ann Arbor stage III or IV disease, ECOG performance status ≥2 and more than one extranodal site to determine prognosis

Abbreviations: ATLL-Adult T-cell Leukemia/Lymphoma, AITL-Angioimmunoblastic T-cell Lymphoma, ALCL-Anaplastic Large-Cell Lymphoma, CTCL-Cutaneous T-cell Lymphoma, PTCL-NOS-Peripheral T-cell Lymphoma not otherwise specified, NK/TCL-Natural Killer-T-cell lymphoma, T-LGL-T-cell large granular lymphocytic leukemia, LDH-lactate dehydrogenase, IPI- International prognostic Index, the IPI score is determined based on a subject's disease characteristics and represents increasing degrees of risk), IQR-Inter-Quartile Range, (CI)-95% Confidence Intervals, y-year(s), NA-not available

**Table S2. Survival probability since lymphoma diagnosis**

| Time since lymphoma diagnosis (y) | S(t) (95% CI)                                                     |                                                                    |
|-----------------------------------|-------------------------------------------------------------------|--------------------------------------------------------------------|
|                                   | NA-ACCORD<br>(PWH with T-cell and NK/T-cell lymphoma)<br>(n = 52) | COMPLETE<br>(PWoH with T-cell and NK/T-cell lymphoma)<br>(n = 450) |
| 1                                 | 0.52 (0.40, 0.67)                                                 | 0.75 (0.71, 0.80)                                                  |
| 2                                 | 0.44 (0.32, 0.60)                                                 | 0.62 (0.58, 0.67)                                                  |
| 3                                 | 0.37 (0.26, 0.53)                                                 | 0.56 (0.52, 0.61)                                                  |
| 4                                 | 0.35 (0.23, 0.51)                                                 | 0.48 (0.44, 0.54)                                                  |
| 5                                 | 0.32 (0.21, 0.49)                                                 | 0.45 (0.41, 0.51)                                                  |
| Median (mo)                       | 12.9 [6.6-51.8]                                                   | 46.2 [36.7-NA]                                                     |

Abbreviations: (CI)-95% Confidence Intervals, S(t)-survival probability, PWH-patients with HIV, PWoH-patients without HIV, mo-months, NA-not reached, y-year(s)

**Table S3. Survival probability since lymphoma diagnosis**

| Time since lymphoma diagnosis (y) | S(t) (95% CI)                            |                                          |
|-----------------------------------|------------------------------------------|------------------------------------------|
|                                   | NA-ACCORD<br>(PWH with ALCL)<br>(n = 26) | COMPLETE<br>(PWoH with ALCL)<br>(n = 79) |
| 1                                 | 0.42 (0.27, 0.66)                        | 0.88 (0.81, 0.96)                        |
| 2                                 | 0.31 (0.17, 0.55)                        | 0.84 (0.76, 0.93)                        |
| 3                                 | 0.23 (0.11, 0.47)                        | 0.82 (0.73, 0.91)                        |
| 4                                 | 0.23 (0.11, 0.47)                        | 0.76 (0.66, 0.87)                        |
| 5                                 | 0.23 (0.11, 0.47)                        | 0.76 (0.66, 0.87)                        |
| Median (mo)                       | 10.6 [2.1-33.4]                          | NA [NA-NA]                               |

Abbreviations: (CI)-95% Confidence Intervals, S(t)-survival probability, ALCL-anaplastic large cell lymphoma, PWH-patients with HIV, PWoH- patients without HIV, mo-months, NA-not reached, y-year(s)

**Table S4: Survival probability of PWH and T-cell lymphoma based on immunological cell count and HIV viremia in NA-ACCORD**

| Time since cancer diagnosis (y) | S(t) (95% CI)                                  |                                             |
|---------------------------------|------------------------------------------------|---------------------------------------------|
|                                 | CD4 $\geq$ 200 and/or HIV RNA <500<br>(n = 12) | CD4 <200 and HIV RNA $\geq$ 500<br>(n = 10) |
| 1                               | 0.82 (0.63, 1)                                 | 0.50 (0.27, 0.93)                           |
| 2                               | 0.73 (0.52, 1)                                 | 0.50 (0.27, 0.93)                           |
| 3                               | 0.73 (0.52, 1)                                 | 0.50 (0.27, 0.93)                           |
| 4                               | 0.73 (0.52, 1)                                 | 0.33 (0.12, 0.92)                           |
| 5                               | 0.73 (0.52, 1)                                 | 0.17 (0.03, 0.93)                           |
| Median (mo)                     | NA [NA-NA]                                     | 26.1 [1.3-NA]                               |

Abbreviation: PWH-patients with HIV, CD4 count is quantified in cells/ $\mu$ L before initiation of antiretroviral drugs, HIV RNA level is quantified in copies/ml before initiation of antiretroviral drugs, (CI)-95% Confidence Intervals, S(t)-survival probability, mo-months, NA-not reached, y-year(s)

**Table S5. Bonferroni adjusted p values for baseline demographic and clinical characteristics in NA-ACCORD**

| <b>Patient Features</b>                            | <b>PWH with T-cell and NK/T-cell lymphoma</b> | <b>PWH with Burkitt's lymphoma</b> | <b>PWH with Primary CNS lymphoma</b> | <b>PWH with DLBCL</b> | <b>P value<sup>a</sup></b> | <b>Pairwise comparisons – Bonferroni adjusted p values</b>                                          |
|----------------------------------------------------|-----------------------------------------------|------------------------------------|--------------------------------------|-----------------------|----------------------------|-----------------------------------------------------------------------------------------------------|
|                                                    | (n = 52)                                      | (n = 101)                          | (n = 64)                             | (n = 500)             |                            |                                                                                                     |
| Age at diagnosis of lymphoma (years), Median (IQR) | 49 (43-55)                                    | 47 (39-51)                         | 41 (37-49)                           | 47 (40-55)            | <0.001                     | 0.045 (Burkitt's vs. Primary CNS)<br><0.001 (Primary CNS vs. TCL)<br><0.001 (Primary CNS vs. DLBCL) |
| Race, No. (%)                                      |                                               |                                    |                                      |                       | 0.04 <sup>b</sup>          | 0.03 (Burkitt's vs. Primary CNS)                                                                    |
| White                                              | 30/47 (64)                                    | 58/94 (62)                         | 21/58 (37)                           | 255/461 (55)          |                            |                                                                                                     |
| Black                                              | 16/47 (34)                                    | 31/94 (33)                         | 34/58 (59)                           | 189/461 (41)          |                            |                                                                                                     |
| Other                                              | 1/47 (2)                                      | 5/94 (5)                           | 3/58 (5)                             | 17/461 (4)            |                            |                                                                                                     |
| Co-morbid conditions, No. (%)                      |                                               |                                    |                                      |                       |                            |                                                                                                     |
| Chronic kidney disease                             | 10 (19)                                       | 7 (7)                              | 2 (3)                                | 62 (12)               | 0.02 <sup>b</sup>          | 0.03 (Primary CNS vs. TCL)                                                                          |
| No of cases diagnosed per calendar period, No. (%) |                                               |                                    |                                      |                       |                            |                                                                                                     |
| 1996-1999                                          | 10 (19)                                       | 13 (13)                            | 27 (42)                              | 67 (13)               | <0.001                     | <0.001 (Primary CNS vs. Burkitt's)                                                                  |
| 2000-2009                                          | 29 (56)                                       | 54 (53)                            | 31 (48)                              | 292 (58)              |                            | <0.001 (Primary CNS vs. DLBCL)                                                                      |
| 2010-2016                                          | 13 (25)                                       | 34 (34)                            | 6 (9)                                | 141 (28)              |                            |                                                                                                     |
| Alive, No. (%)                                     | 18 (35)                                       | 53 (52)                            | 11 (17)                              | 200 (40)              | <0.001                     | <0.001 (Primary CNS vs. Burkitt's)<br><0.001 (Primary CNS vs. DLBCL)                                |
| Age at NA-ACCORD Enrollment (years), Median (IQR)  | 44 (41-50)                                    | 43 (35-47)                         | 39 (34-45)                           | 43 (36-50)            | 0.01                       | 0.01 (DLBCL vs. Primary CNS)<br>0.01 (TCL vs. Primary CNS)                                          |

<sup>a</sup>P values for the comparison between patients in different lymphoma groups (T-cell and NK/T-cell lymphomas, Burkitt's, PCNSL, DLBCL) were calculated using ANOVA and chi-square test for continuous and categorical variables, respectively

<sup>b</sup>P-values based on Fisher's exact test due to some small cell counts

Patient with chronic kidney disease (CKD) were defined as those who ever had an eGFR consistently <60 mL/min/1.73m<sup>2</sup> for at least 3 months

Abbreviations: PWH-people with HIV, IQR-Inter-Quartile Range, PCNSL-primary central nervous system lymphoma, DLBCL-diffuse large B-cell lymphoma



**Table S6: Extended clinical characteristics for patients with HIV with non-Hodgkin lymphomas**

| Features                                    | T-cell and NK/T-cell lymphoma (n = 52) | Burkitt's lymphoma (n = 101) | Primary CNS lymphoma (n = 64) | DLBCL (n = 500) | <sup>a</sup> P      |
|---------------------------------------------|----------------------------------------|------------------------------|-------------------------------|-----------------|---------------------|
| HIV transmission group, No. (%)             |                                        |                              |                               |                 |                     |
| IV drug use                                 | 12 (23)                                | 23 (23)                      | 15 (23)                       | 108 (22)        | 0.98                |
| MSM                                         | 9 (17)                                 | 44 (44)                      | 9 (14)                        | 154 (31)        | <0.001              |
| Heterosexual transmission                   | 5 (10)                                 | 10 (10)                      | 9 (14)                        | 73 (15)         | 0.51                |
| Other <sup>b</sup>                          | 0                                      | 1 (1)                        | 3 (5)                         | 14 (3)          | 0.34 <sup>c</sup>   |
| Unknown                                     | 28 (54)                                | 29 (29)                      | 28 (44)                       | 171 (34)        | 0.008               |
| AIDS-defining illnesses infections, No. (%) |                                        |                              |                               |                 |                     |
| Candidiasis                                 | 4 (8)                                  | 5 (5)                        | 15 (23)                       | 63 (13)         | 0.003               |
| CMV                                         | 4 (8)                                  | 7 (7)                        | 9 (14)                        | 47 (9)          | 0.50 <sup>c</sup>   |
| Coccidiomycosis                             | 0                                      | 1 (1)                        | 0                             | 1 (<1)          | 0.51 <sup>c</sup>   |
| Cryptococcus                                | 1 (2)                                  | 1 (1)                        | 5 (8)                         | 24 (5)          | 0.12 <sup>c</sup>   |
| Cryptosporidiosis                           | 1 (2)                                  | 0                            | 3 (5)                         | 5 (1)           | 0.06 <sup>c</sup>   |
| HSV                                         | 1 (2)                                  | 1 (1)                        | 2 (3)                         | 10 (2)          | 0.74 <sup>c</sup>   |
| Histoplasmosis                              | 0                                      | 2 (2)                        | 1 (2)                         | 13 (3)          | 0.87 <sup>c</sup>   |
| Isosporiasis                                | 0                                      | 0                            | 0                             | 2 (<1)          | >0.99 <sup>c</sup>  |
| MAC                                         | 1 (2)                                  | 2 (2)                        | 7 (11)                        | 18 (4)          | 0.04 <sup>c</sup>   |
| Mycobacterium                               | 1 (2)                                  | 1 (1)                        | 6 (9)                         | 14 (3)          | 0.03 <sup>c</sup>   |
| TB                                          | 0                                      | 3 (3)                        | 10 (16)                       | 17 (3)          | <0.001 <sup>c</sup> |
| PCP                                         | 6 (12)                                 | 5 (5)                        | 14 (22)                       | 76 (15)         | 0.01                |
| Toxoplasmosis                               | 0                                      | 0                            | 4 (6)                         | 10 (2)          | 0.047 <sup>c</sup>  |
| Co-morbid conditions, No. (%)               |                                        |                              |                               |                 |                     |
| Diabetes                                    | 6 (12)                                 | 15 (15)                      | 8 (13)                        | 73 (15)         | 0.91                |
| Hypertension                                | 15 (29)                                | 32 (32)                      | 10 (16)                       | 168/494 (34)    | 0.03                |

<sup>a</sup>P-values for the comparison between patients in different lymphoma groups (T-cell lymphomas, Burkitt's, PCNSL, DLBCL) were calculated using chi-square test for categorical variables

<sup>b</sup>Receipt of blood transfusion, blood components, or tissue, or other risk factor

<sup>c</sup>P-values based on Fisher's exact test due to some small cell counts

Abbreviations: Burkitt's- Burkitt's lymphoma, TCL-T-cell lymphoma, PCNSL-primary central nervous system lymphoma, DLBCL-diffuse large B-cell lymphoma, IV-intravenous, MSM-men having sex with men, CMV-cytomegalovirus, HSV-herpes simplex virus, MAC-mycobacterium avium intracellulare, TB-tuberculosis, PCP-pneumocystis carinii pneumoniae

**Table S7. Survival probability since lymphoma diagnosis in NA-ACCORD**

| Time since cancer diagnosis (y) | S(t) (95% CI)                 |                   |                            |                               |                   |
|---------------------------------|-------------------------------|-------------------|----------------------------|-------------------------------|-------------------|
|                                 | T-cell and NK/T-cell lymphoma |                   | Burkitt's lymphoma (n=101) | Primary CNS lymphoma (n = 64) | DLBCL (n = 500)   |
|                                 | ALCL (n = 26)                 | Non-ALCL (n = 26) |                            |                               |                   |
| 1                               | 0.42 (0.27, 0.66)             | 0.62 (0.45, 0.83) | 0.59 (0.50, 0.70)          | 0.27 (0.18, 0.41)             | 0.55 (0.51, 0.60) |
| 2                               | 0.31 (0.17, 0.55)             | 0.57 (0.41, 0.80) | 0.54 (0.45, 0.65)          | 0.21 (0.13, 0.34)             | 0.44 (0.40, 0.49) |
| 3                               | 0.23 (0.11, 0.47)             | 0.53 (0.36, 0.77) | 0.53 (0.44, 0.64)          | 0.18 (0.10, 0.30)             | 0.42 (0.38, 0.46) |
| 4                               | 0.23 (0.11, 0.47)             | 0.46 (0.29, 0.73) | 0.52 (0.43, 0.63)          | 0.16 (0.09, 0.28)             | 0.40 (0.36, 0.45) |
| 5                               | 0.23 (0.11, 0.47)             | 0.40 (0.23, 0.68) | 0.52 (0.43, 0.63)          | 0.16 (0.09, 0.28)             | 0.38 (0.34, 0.43) |
| Median (mo)                     | 10.6 [2.1-33.4]               | 45.6 [2.8-NA]     | NA [13.1-NA]               | 3.8 [2.0-7.2]                 | 15.6 [12.7-22.2]  |

Abbreviation: ALCL-anaplastic large cell lymphoma, PCNSL- primary central nervous system lymphoma, DLBCL-diffuse large B-cell lymphoma, (CI)-95% Confidence Intervals, S(t)-survival probability, mo-months, NA-not reached

**Table S8: Sensitivity analysis for patients lost to follow up in NA-ACCORD**

| Time of follow-up (y) | Min | 1 <sup>st</sup> Quarter | Median | Mean | 3 <sup>rd</sup> Quarter | Max |
|-----------------------|-----|-------------------------|--------|------|-------------------------|-----|
| Main analysis         | 0.0 | 0.22                    | 1.07   | 2.09 | 5.0                     | 5.0 |
| Sensitivity analysis  | 0.0 | 0.14                    | 0.55   | 1.34 | 1.66                    | 5.0 |

Abbreviation: y-year(s)

**Table S9. Baseline demographic and clinical characteristics for PWH with T-cell and NK/T-cell lymphoma vs. PWH with Hodgkin's lymphoma within NA-ACCORD (N=298)**

| Characteristic                                                                        | PWH with T-cell and NK/T-cell lymphoma (n = 52) | PWH with Hodgkin's lymphoma (n = 246) | P <sup>a</sup>     |
|---------------------------------------------------------------------------------------|-------------------------------------------------|---------------------------------------|--------------------|
| Age at diagnosis of lymphoma (years), Median (IQR)                                    | 49 (43-55)                                      | 48 (43-56)                            | 0.63               |
| Biological Sex, No. (%)                                                               |                                                 |                                       |                    |
| Male                                                                                  | 50 (96)                                         | 233 (95)                              | >0.99 <sup>b</sup> |
| Race, No. (%)                                                                         |                                                 |                                       |                    |
| White                                                                                 | 30/47 (64)                                      | 99/218 (45)                           | 0.04               |
| Black                                                                                 | 16/47 (34)                                      | 115/218 (53)                          |                    |
| Other                                                                                 | 1/47 (2)                                        | 4/218 (2)                             |                    |
| Co-morbid conditions, No. (%)                                                         |                                                 |                                       |                    |
| Chronic kidney disease <sup>c</sup>                                                   | 10 (19)                                         | 47 (19)                               | >0.99              |
| Co-infections, No. (%) <sup>#</sup>                                                   |                                                 |                                       |                    |
| HBV                                                                                   | 7 (13)                                          | 28 (11)                               | 0.86               |
| HCV                                                                                   | 10 (19)                                         | 36 (15)                               | 0.53               |
| No of cases per calendar period, No. (%)                                              |                                                 |                                       |                    |
| 1996-1999                                                                             | 10 (19)                                         | 31 (13)                               | 0.28               |
| 2000-2009                                                                             | 29 (56)                                         | 131 (53)                              |                    |
| 2010-2016                                                                             | 13 (25)                                         | 84 (34)                               |                    |
| Alive at study exit, No. (%)                                                          | 18 (35)                                         | 160 (65)                              | <0.001             |
| Age at NA-ACCORD Enrollment (years), Median (IQR)                                     | 44 (41-50)                                      | 43 (36-50)                            | 0.16               |
| Time to diagnosis of lymphoma from time of NA-ACCORD Enrollment (years), Median (IQR) | 2.3 (0.3-5.9)                                   | 3.9 (1.9-7.5)                         | 0.004              |

<sup>a</sup>P values for the comparison between patients with TCL and NK/TCL versus with Hodgkin's lymphoma were calculated using t-test, Wilcoxon rank sum test, and chi-square test for normally distributed continuous, non-normally distributed continuous, and categorical variables, respectively

<sup>b</sup>P-values based on Fisher's exact test due to some small cell counts

<sup>c</sup>Patient with chronic kidney disease (CKD) were defined as those who ever had an eGFR consistently < 60 mL/min/1.73m<sup>2</sup> for at least 3 months

<sup>#</sup>HBV: hepatitis B virus, as determined by detection of surface antigen, e antigen or DNA quantification; HCV: hepatitis C virus as determined by detection of antibody, RNA quantification or genotype

Abbreviations: PWH-people with HIV, IQR-Inter-Quartile Range

**Table S10. Survival probability since lymphoma diagnosis within NA-ACCORD**

| Time since lymphoma diagnosis (y) | S(t) (95% CI)                                   |                                       |
|-----------------------------------|-------------------------------------------------|---------------------------------------|
|                                   | PWH with T-cell and NK/T-cell lymphoma (n = 52) | PWH with Hodgkin's lymphoma (n = 246) |
| 1                                 | 0.52 (0.40, 0.67)                               | 0.76 (0.71, 0.81)                     |
| 2                                 | 0.44 (0.32, 0.60)                               | 0.69 (0.63, 0.75)                     |
| 3                                 | 0.37 (0.26, 0.53)                               | 0.67 (0.61, 0.73)                     |
| 4                                 | 0.35 (0.23, 0.51)                               | 0.64 (0.58, 0.70)                     |
| 5                                 | 0.32 (0.21, 0.49)                               | 0.63 (0.57, 0.69)                     |

|             |                 |            |
|-------------|-----------------|------------|
| Median (mo) | 12.9 [6.6-51.8] | NA [NA-NA] |
|-------------|-----------------|------------|

Abbreviations: (CI)-95% Confidence Intervals, S(t)-survival probability, PWH-patients with HIV, mo-months, NA-not reached, y-year(s)

## FIGURE LEGEND

**Supplementary Figure 1. Overall survival (OS) at 5 years for PWH with T-cell and NK/T-cell lymphoma (TCL and NK/TCL) relative to PWH with Hodgkin's lymphoma enrolled in NA-ACCORD between 1996-2016.** Kaplan-Meier analysis of (A) OS for all mature TCL and NK/TCL patients in contrast with Hodgkin's lymphoma, and (B) OS for all mature TCL and NK/TCL patients in contrast with Hodgkin's lymphoma stratified by period of diagnosis.

Abbreviations: Hodgkin's-Hodgkin's lymphoma

**A**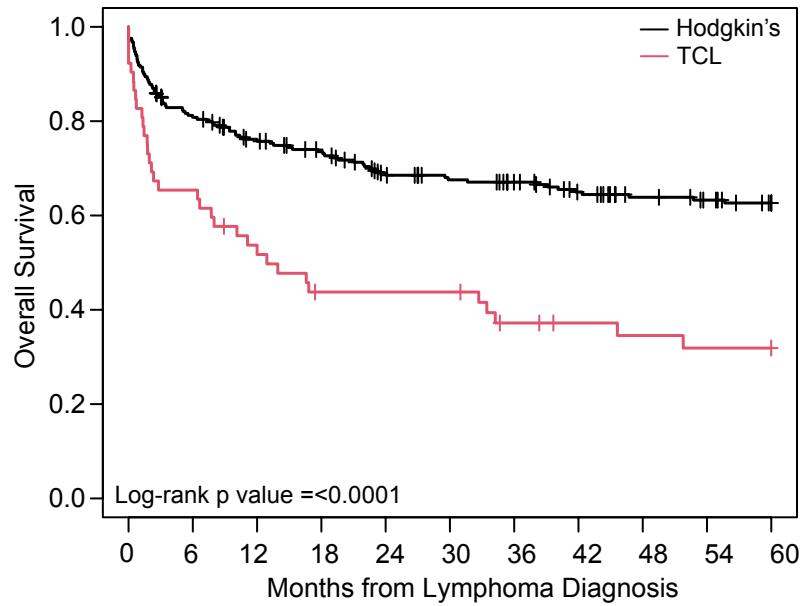

|         |     |     |     |     |     |     |     |     |     |   |
|---------|-----|-----|-----|-----|-----|-----|-----|-----|-----|---|
| N = 246 | 195 | 177 | 165 | 147 | 139 | 132 | 121 | 110 | 105 | 1 |
| N = 52  | 34  | 27  | 21  | 21  | 21  | 16  | 14  | 13  | 12  |   |

**B**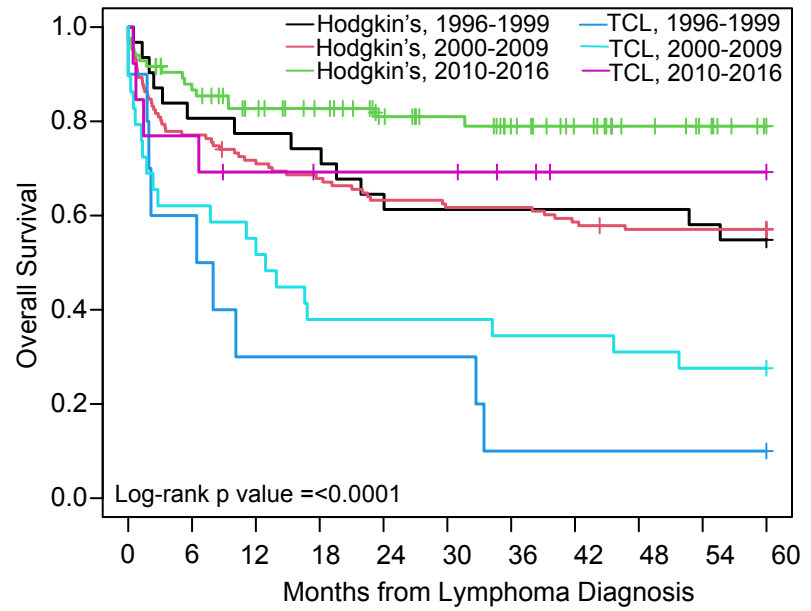

|         |     |    |    |    |    |    |    |    |    |   |
|---------|-----|----|----|----|----|----|----|----|----|---|
| N = 31  | 25  | 24 | 23 | 20 | 19 | 19 | 19 | 19 | 18 |   |
| N = 131 | 101 | 93 | 88 | 82 | 80 | 80 | 76 | 73 | 73 | 1 |
| N = 84  | 69  | 60 | 54 | 45 | 40 | 33 | 26 | 18 | 14 |   |
| N = 10  | 6   | 3  | 3  | 3  | 3  | 1  | 1  | 1  | 1  |   |
| N = 29  | 18  | 16 | 11 | 11 | 11 | 10 | 10 | 9  | 8  |   |
| N = 13  | 10  | 8  | 7  | 7  | 7  | 5  | 3  | 3  | 3  |   |
